# Supplementary material for: CHAMP1 binds to REV7/FANCV and promotes homologous recombination repair
Source: PubMed Central journal article supplement — Cell Rep. Author manuscript; Available in PMC 2022 Sep 14. (PMC9472291; doi:10.1016/j.celrep.2022.111297), 2022-08-30
Supplement: NIHMS1833564-supplement-1.pdf [file NIHMS1833564-supplement-1.pdf]

**Cell Reports, Volume 40**

**Supplemental information**

**CHAMP1 binds to REV7/FANCV and promotes  
homologous recombination repair**

**Feng Li, Prabha Sarangi, Divya Ramalingam Iyer, Hanrong Feng, Lisa Moreau, Huy  
Nguyen, Connor Clairmont, and Alan D. D'Andrea**

Figure S1, **CHAMP1** depletion sensitizes cells to **PARPi**, related to Fig. 1.

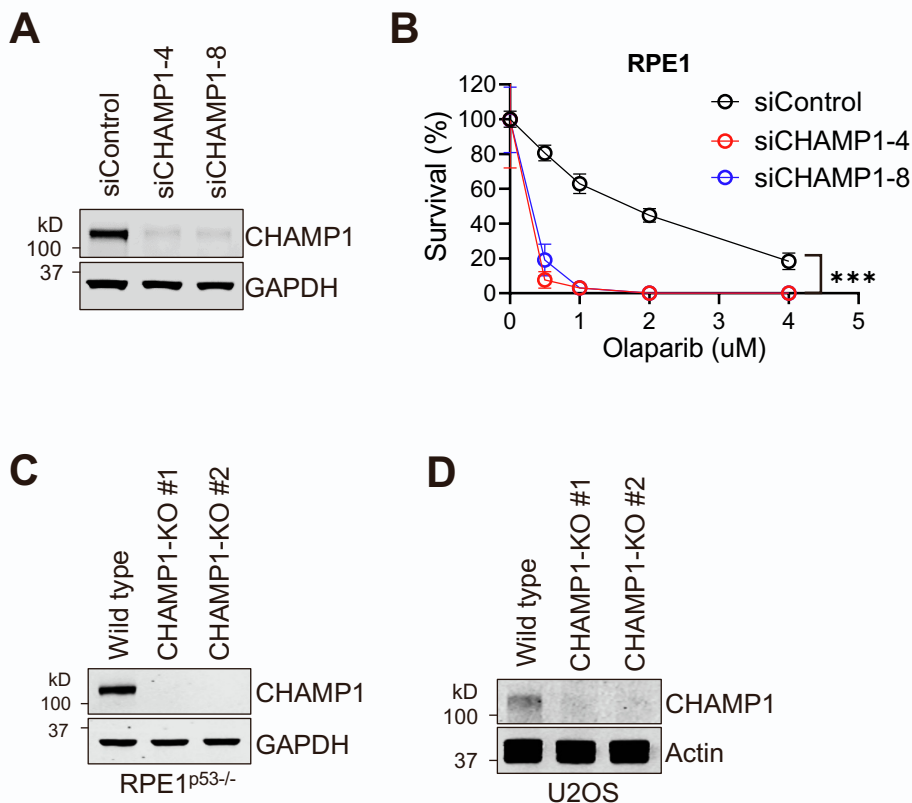

**Supplemental figure 1, related to Figure 1.**

**A**, Western blot showing knocking down efficiency of siRNA targeting CHAMP1. U2OS cells were treated with siRNA negative control or siCHAMP1 for 48hrs. **B**, A 14 days clonogenic assay of RPE1 cells treated with siRNA control and siCHAMP1, and treated with various doses of Olaparib; n=3 independent experiments, \*\*\*P<0.001. Statistical analysis was performed using two-way ANOVA. **C**, Western blot showing the lack of CHAMP1 expression in two CHAMP1 knockout RPE1 cell lines. **D**, Western blot showing the lack of CHAMP1 expression in two CHAMP1 knockout U2OS cell lines.

Figure S2, **CHAMP1 and TRIP13 have non-epistatic activity, related to Fig. 2.**

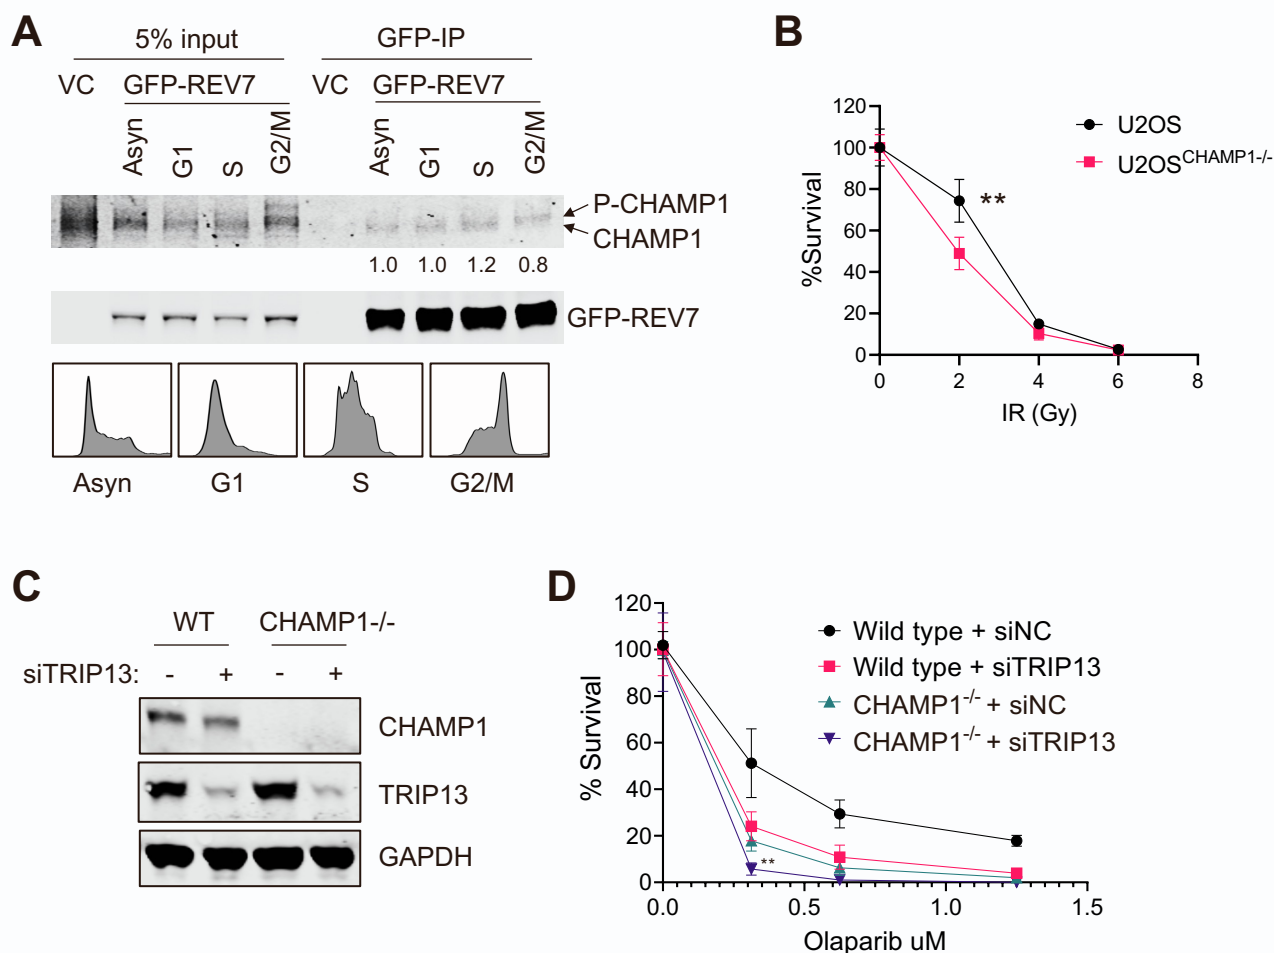

**Supplemental figure 2, related to Figure 2.**

**A**, 293T cells were transfected with GFP-tagged REV7, and following treatment with thymidine (2.5mM for 16h, G1) or thymidine (2.5mM for 16h, and release for 2h, S) or nocodazole (0.5ug/ml for 16h, G2/M). (Top) Western blot showing the GFP-REV7 and the co-immunoprecipitation of endogenous CHAMP1. (Bottom) Same cells were analyzed by flow cytometry to detect cell cycle. **B**, A 14 days clonogenic assay of U2OS wild type and CHAMP1-KO U2OS cell line, treated with various doses of IR; n=3 independent experiments. \*\*P<0.01. Statistical analysis was performed using two-way ANOVA. **C**, The U2OS-wild type (WT) and U2OS<sup>CHAMP1-/-</sup> cells were transfected with siRNA targeting TRIP13 for 48 hours. Western blot shows the expression of endogenous CHAMP1 and TRIP13. **D**, A 14 days clonogenic assay of indicated cell lines treated with various doses of Olaparib; n=3 independent experiments, \*\*P<0.01. Statistical analysis was performed using two-way ANOVA.

Figure S3, **CHAMP1 regulates HR through REV7**, related to Fig. 3.

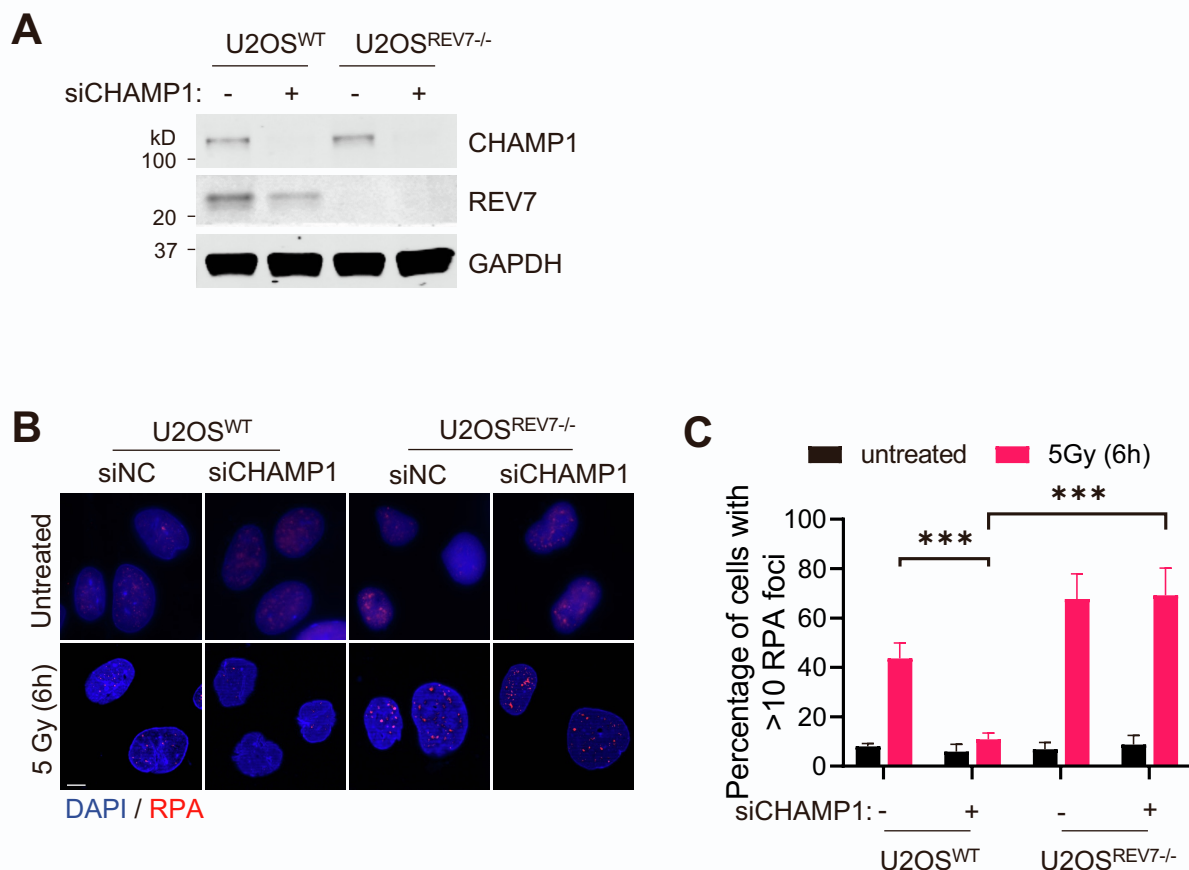

**Supplemental figure 3, related to Figure 3.**

**A**, The U2OS-wild type (WT) and U2OS<sup>REV7-/-</sup> cells were transfected with siRNA targeting CHAMP1 for 48 hours. Western blot shows the expression of endogenous CHAMP1 and REV7. **B**, Representative images of p-RPA32(S33) foci formation in wild-type and *REV7*<sup>-/-</sup> U2OS cells treated with siRNA negative control (siNC) and siCHAMP1, and 6 hours after 5Gy IR treatment. Scale bar, 5  $\mu$ m. **C**, Quantification of p-RPA32(S33) foci in **A**. More than 10 p-RPA32(S33) foci were counted. n=3 biologically independent experiments, \*\*\*P < 0.001. Statistical analysis was performed using two-tailed student's t-tests.

Figure S4, **CHAMP1** regulates HR through Shieldin complex, related to Fig. 4.

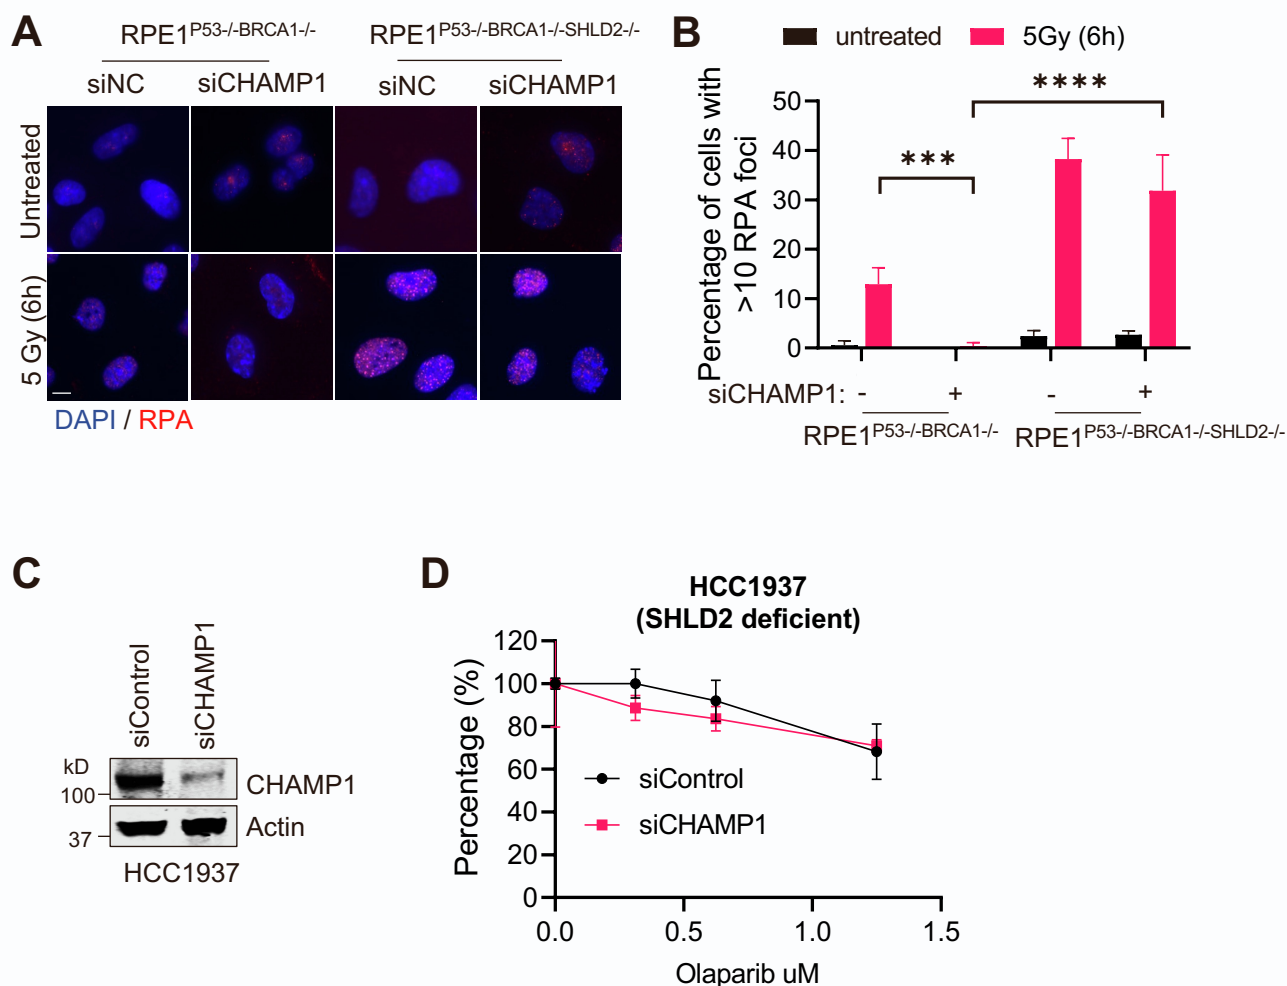

Supplemental figure 4, related to Figure 4.

**A**, Representative images of p-RPA32(S33) foci formation in RPE1<sup>P53-/-BRCA1-/-</sup> and RPE1<sup>P53-/-BRCA1-/-SHLD2-/-</sup> cells treated with siRNA negative control (siNC) and siCHAMP1, and 6 hours after 5Gy IR treatment. Scale bar, 5  $\mu$ m. **B**, Quantification of p-RPA32(S33) foci in C. More than 10 p-RPA32(S33) foci were counted. n=3 biologically independent experiments, \*\*\*P < 0.001. Statistical analysis was performed using two-tailed student's t-tests. **C**, HCC1937 cells (SHLD2 deficient) treated with siControl or siCHAMP1 for 48h. Western blot showing the expression of CHAMP1. Actin acts as loading control. **D**, A 14 days clonogenic assay of HCC1937 cells (SHLD2 deficient) treated with siControl or siCHAMP1 with various doses of Olaparib.

Figure S5, **CHAMP1 increases HR activity by binding to REV7**, related to Fig. 5.

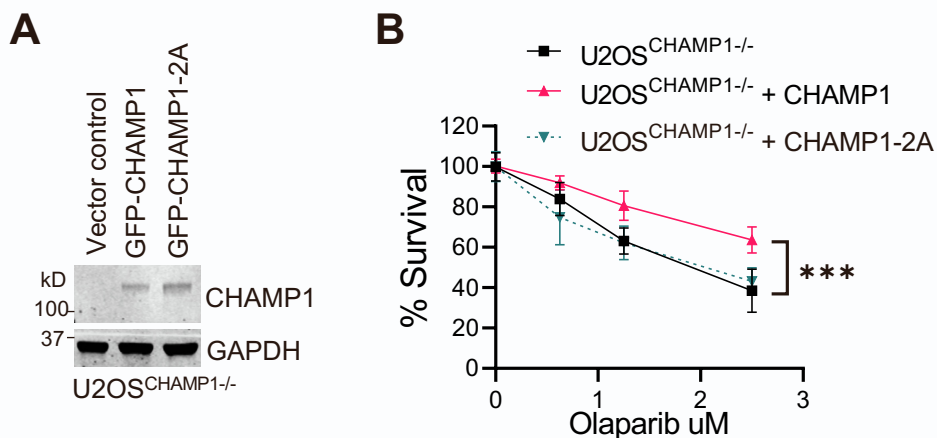

**Supplemental figure 5, related to Figure 5.**

**A**, U2OS<sup>CHAMP1-/-</sup> cells were transfected with GFP-Empty Vector, GFP-CHAMP1 wild-type or GFP-CHAMP1-2A mutant. Western blot showing the expression of CHAMP1. GAPDH acts as loading control. **B**. A 14 days clonogenic assay of indicated cell lines treated with various doses of Olaparib; n=3 independent experiments, \*\*P<0.001. Statistical analysis was performed using two-way ANOVA.

Figure S6, high CHAMP1 expression correlated with poor patient prognosis in high REV7 expression patients, related to Fig. 6.

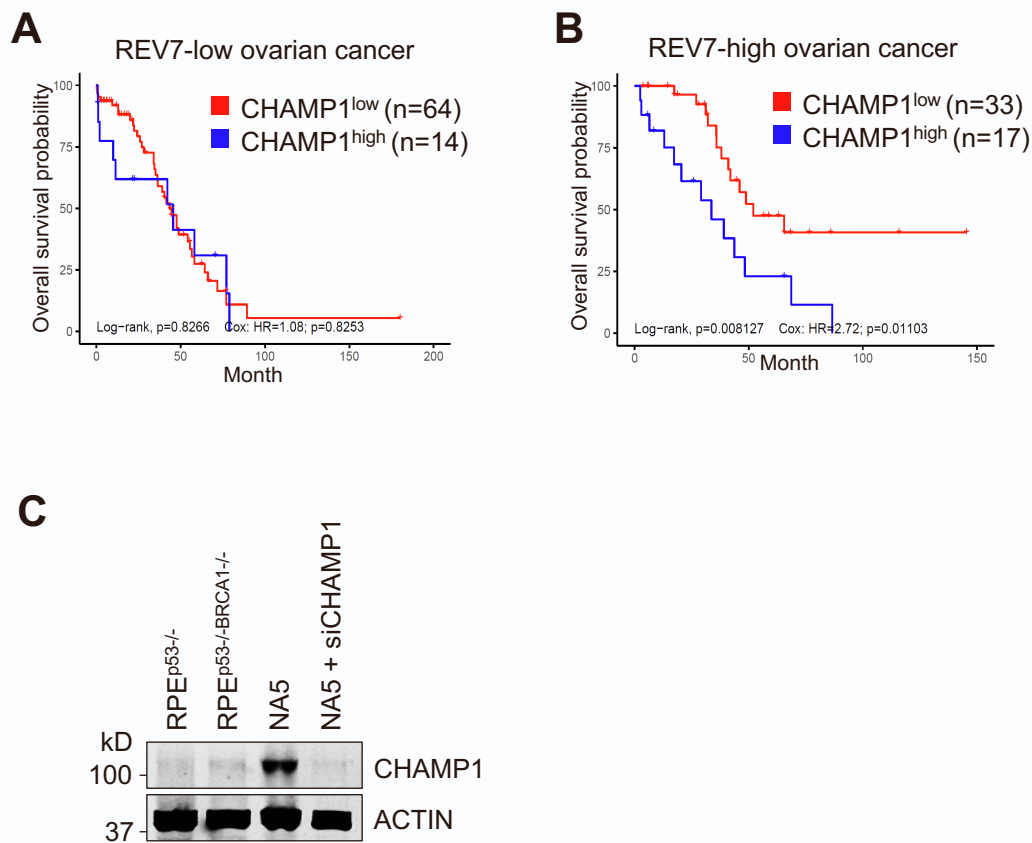

**Supplemental figure 6, related to Figure 6.**

**A-B**, Kaplan–Meier curves depicting overall survival of ovarian cancer patients with CHAMP1 expression and REV7 expression. N represents number of patients. **C**, Western blot showing the expression of CHAMP1 in indicated cells.

Figure S7, **POGZ** promotes homologous recombination, related to Fig. 7.

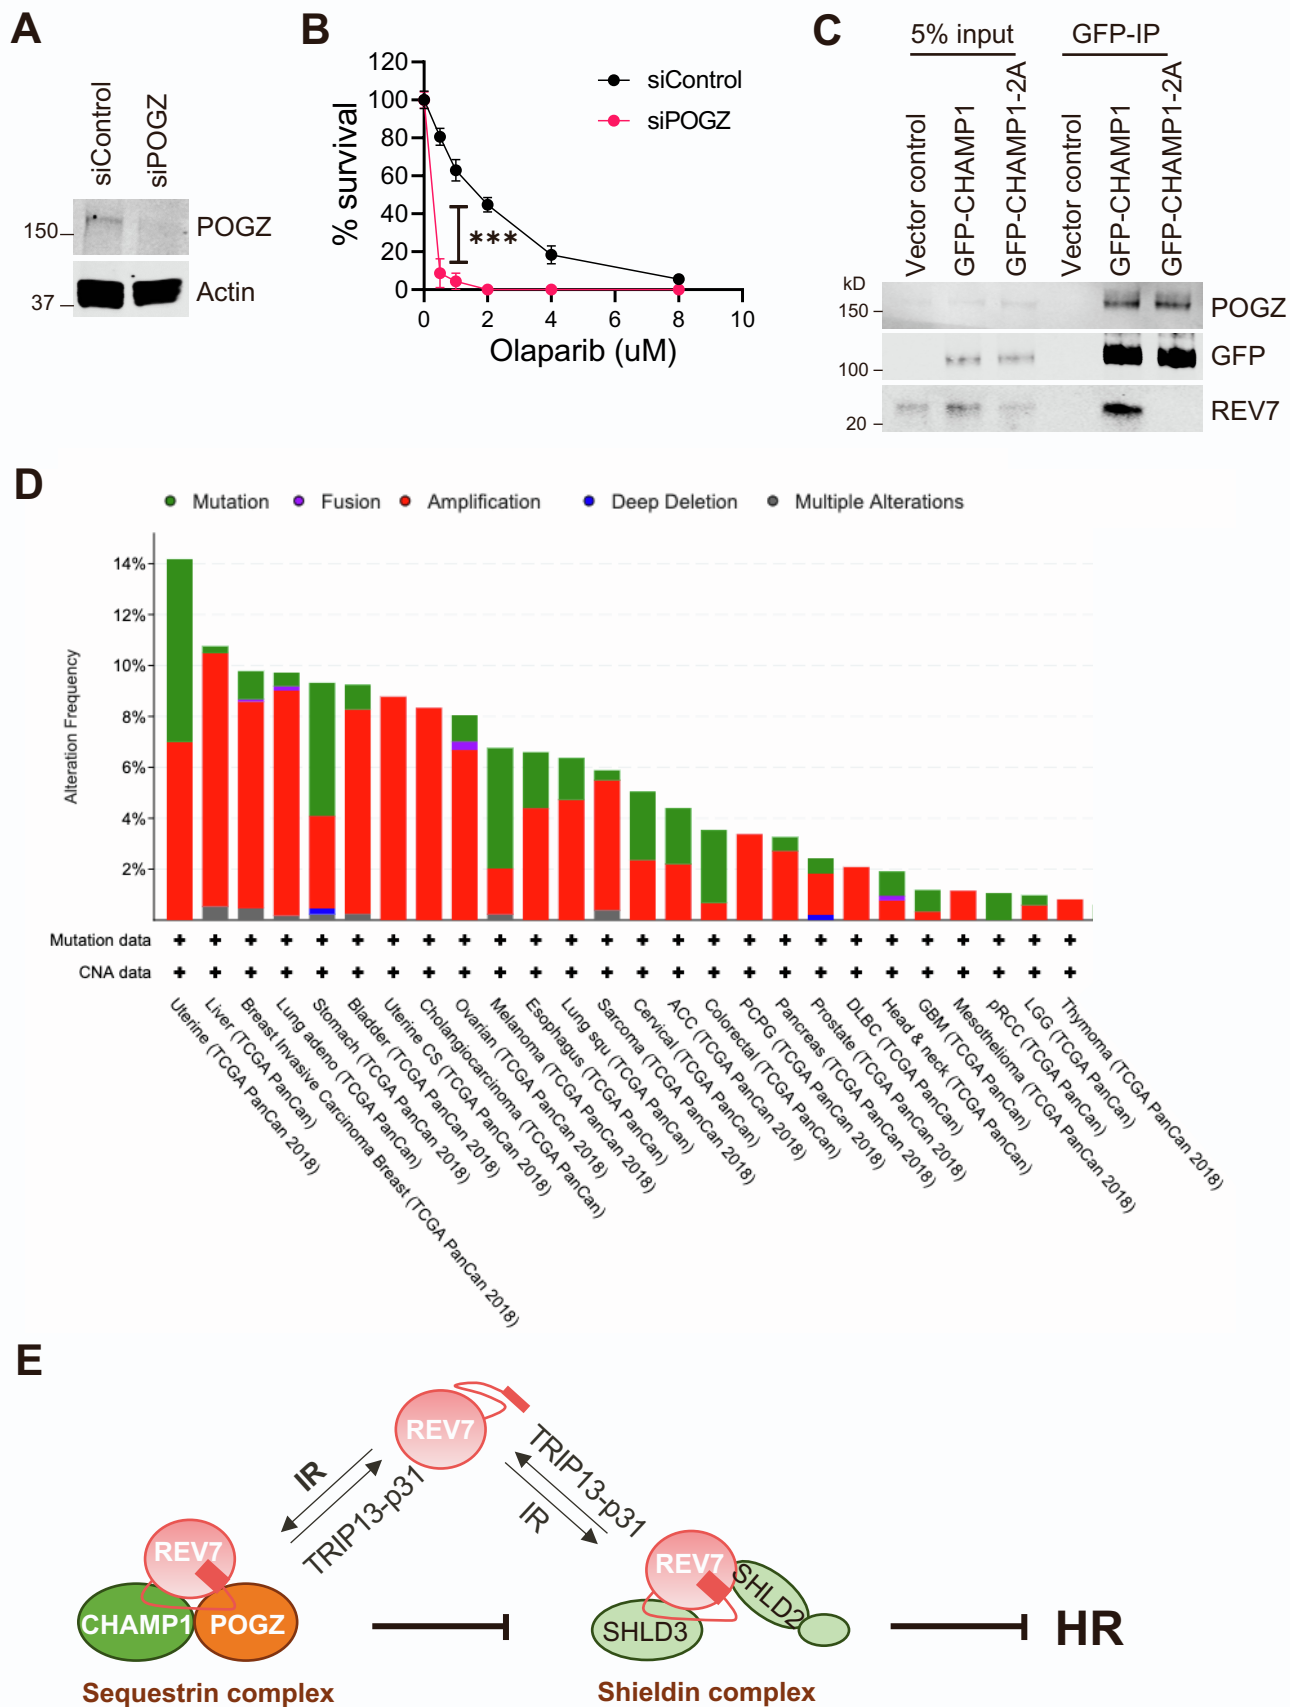



**Supplemental figure 7, related to Figure 7.**

**A**, Western blot showing knocking down efficiency of siRNA targeting POGZ. U2OS cells were treated with siRNA negative control or siCHAMP1 for 48hrs. **B**, A 14 days clonogenic assay of RPE1 cells treated with siRNA control or siPOGZ with various doses of Olaparib; n=3 independent experiments, \*\*\*P<0.001. Statistical analysis was performed using two-way ANOVA. **C**, Western blot showing GFP-immunoprecipitation of GFP-CHAMP1 or -CHAMP1-2A mutant, and the co-immunoprecipitation of endogenous REV7 and POGZ in HEK293T cells. **D**, Bar chart showing the prevalence of amplifications (red), deletions (blue), and mutations (green) of the POGZ gene across an array of cancer types in TCGA. **E**, Schematic of our proposed model of CHAMP1/POGZ function in HR regulation.
